# Supplementary material
Source: Springer Nature journal article supplement (https://www.springermedizin.de/resource/supplementary/12939_2006_85_MOESM3_ESM.pdf/9551506)
Supplement: MOESM3 [file 9551506]

**Table 3.**

**Logistic regression analyses: Patients' satisfaction with their last GP-visit. Dependent variable: "very/moderately satisfied" (reference) versus "not satisfied".**

|                       | The Oslo Health Study |              |           | The Oslo Immigrant Health Study |              |           |
|-----------------------|-----------------------|--------------|-----------|---------------------------------|--------------|-----------|
|                       | N                     | OR(adjusted) | 95% CI    | N                               | OR(adjusted) | 95% CI    |
| Country I             |                       |              |           |                                 |              |           |
| Norway                | 7306                  | ref          |           |                                 |              |           |
| Non-western           | 689                   | 2.0          | (1.5-2.7) |                                 |              |           |
| Gender                |                       |              |           |                                 |              |           |
| Women                 | 4383                  | ref          |           | 534                             | ref          |           |
| Men                   | 3612                  | 1.4          | (1.1-1.7) | 570                             | 1.1          | (0.7-1.5) |
| Age                   |                       |              |           |                                 |              |           |
| Young                 | 5767                  | 2.9          | (1.7-2.9) | 874                             | 2.5          | (1.5-4.4) |
| Old                   | 2228                  | ref          |           | 230                             | ref          |           |
| Own health            |                       |              |           |                                 |              |           |
| Not good              | 1611                  | 1.8          | (1.4-2.3) | 470                             | 2.3          | (1.6-3.5) |
| Acceptable            | 6384                  | ref          |           | 634                             | ref          |           |
| Income producing work |                       |              |           |                                 |              |           |
| Full time             | 5886                  | 1.6          | (1.1-2.4) | 599                             | 0.8          | (0.5-1.2) |
| Part time             | 995                   | ref          |           | 160                             | 0.6          | (0.3-1.1) |
| Not working           | 1114                  | 1.9          | (1.3-3.0) | 345                             | ref          |           |
| Country II            |                       |              |           |                                 |              |           |
| Sri Lanka             |                       |              |           | 299                             | ref          |           |
| Tyrkia                |                       |              |           | 177                             | 2.6          | (1.4-5.0) |
| Iran                  |                       |              |           | 245                             | 2.8          | (1.5-5.1) |

|          |  |  |  |     |     |           |
|----------|--|--|--|-----|-----|-----------|
| Pakistan |  |  |  | 174 | 2.6 | (1.4-5.0) |
| Vietnam  |  |  |  | 209 | 2.0 | (1.1-3.9) |
